# Supplementary material for: A derivative-free optimisation method for global ocean biogeochemical models
Source: Copernicus journal article supplement (doi:10.5194/gmd-2021-175), 2021-09-30
Supplement: Supplementary file [file gmd-2021-175-AC2-supplement.pdf]

Hello,

We thank the reviewer very much for their comments and corrections. We have made revisions as suggested in all comments made by the reviewer, with the one exception of item 47 below, where we hope the new information provided justifies this decision.

In the itemised list below we have responded to each of the suggestions and comments provided by the reviewer (in italics). We thank the reviewer for these, and hope we have responded satisfactorily and clearly.

1. *I. 1: "performance" of biogeochemical models could be confused with computational cost (the way "performance" is used when talking about DFO-LS). What about "skill"?*

We thank the reviewer for this comment. We have changed "performance" to "skill" when discussing biogeochemical models as suggested, in Line 1 and also in Line 22.

2. *I. 34: I am unsure the Li and Primeau (2008) citation is an application of the Transport Matrix Method. (Maybe clarify or remove it?)*

We thank the reviewer for this comment. Li and Primeau (2008) use a version of transport matrix methodology, however not the Transport Matrix Method specifically mentioned in this sentence, so rephrasing was necessary for clarity. We have changed

"However, with the aid of fast "offline" circulation schemes, such as the Transport Matrix Method (Khatriwala et al., 2005; Li and Primeau, 2008) which can be applied to time-dependent biogeochemical models, more recently, complex global ocean biogeochemical models have also begun to be systematically optimised to observations ..."

to be

"However, with the aid of fast "offline" circulation schemes, such as those using transport matrix methodology (e.g. Khatriwala et al., 2005; Li and Primeau, 2008) which can be applied to time-dependent biogeochemical models, more recently, complex global ocean biogeochemical models have also begun to be systematically optimised to observations ...".

3. *I. 37: "use finite differences or adjoint" This is an inexact distinction of cases. Derivatives can sometimes be derived symbolically (manually or computationally) and evaluated directly (see, e.g., Dickinson and Gelinias, 1976; doi:10.1016/0021-9991(76)90007-3). Most often symbolic derivations are impractical, so one falls back on numerical techniques, such as finite differences. But there are other more efficient and accurate methods (see, e.g., Griewank and Walther, 2008; doi:10.1137/1.9780898717761).*

We thank the reviewer for this comment. We have rephrased

"Derivative-based algorithms such as Gauss-Newton (Hartley, 1961) use finite differences or adjoints to calculate derivatives within the parameter space to locate minima. They can be both computationally expensive and generally less robust on or even unsuitable for noisy problems. Derivative-free algorithms (Conn et al., 2009) in contrast can be less computationally expensive and are better adapted to handle noisy misfit functions."

to

“Derivative-based algorithms such as Gauss-Newton (Hartley, 1961) use derivatives within the parameter space to locate minima. The calculation of derivatives, which can be undertaken using finite differences or automatic differentiation/adjoints (Griewank and Walther, 2008), can be prohibitively expensive in some cases, such as when evaluating the misfit function is computationally costly or noisy (Chapters 8 and 9 of Nocedal and Wright, 2006). By contrast, derivative-free algorithms (Conn et al., 2009) may require less evaluations per iteration and are typically better adapted to handle noisy misfit functions.”

4. *I. 37–38: "to calculate derivatives" This is technically incorrect. Gauss-Newton and other derivative-based algorithms use derivatives but do not calculate them.*

We thank the reviewer for this comment. The revision made in regard to the previous comment (item 3) satisfies this comment also.

5. *I. 38–39: "They can be both computationally expensive and generally less robust on or even unsuitable for noisy problems" Is there a reference for this? While I am convinced that the authors are correct with regards to the pitfalls of a derivative-based algorithm in the case of noisy problems, I am failing to see a strong argument for computational efficiency. While it is true that evaluating a derivative is not free, it provides information that can drastically improve the convergence rate of the optimization algorithm. This needs to be discussed in more detail in my opinion.*

We thank the reviewer for this comment. We hope the revision made in regard to the previous comment (item 3) satisfies this comment also.

We believe there's a strong argument to be made based on computational efficiency. To calculate the gradient in n-dimensional space with finite differences requires n+1 function evaluations, i.e., running the model n+1 times to equilibrium. If using automatic-differentiation (AD), the code not only requires formulating in a way that is differentiable (which would entail rewriting many widely used, existing models), but for the adjoint of the full ocean circulation-biogeochemical model to be constructed, along with the associated complexities of check pointing (saving) the full nonlinear model trajectory over a 3000-year spinup. None of this is trivial or cheap, and is impractical to implement for most existing ocean/biogeochemical models. Lastly, we note that AD requires appropriate software. Nearly all biogeochemical models are written in Fortran, and in our experience the only reliable AD tool in this topic area is TAF, a commercial product. We could add a footnote to include this, if the reviewer feels this is necessary.

6. *I. 58: "interpolated" I think one could argue that the authors here mean extrapolated.*

We thank the reviewer for this comment. When mapping global sparse observations to a global grid, it can be done mainly by interpolation, and with some extrapolation (maybe at the coastlines and near the sea floor). We have rephrased

“Sparse scattered oceanic observations are commonly interpolated onto a regular grid, introducing significant error, especially in regions such as the Southern Ocean with poor data coverage.”

to

“Sparse scattered oceanic observations are commonly mapped onto a regular grid using methods such as objective interpolation, introducing significant error, especially in regions such as the Southern Ocean with poor data coverage.”

7. *l. 60 "Section 4" and "Section 5" should be spelled out for consistency.*

We thank the reviewer for this comment. We have changed to “Section 4” and “Section 5”.

8. *l. 73: Are the 6 parameters the same as those optimized by Kriest et al. (2017)? If so, this could be made clearer.*

We thank the reviewer for this comment. We have rephrased

“The behaviour of MOPS is controlled by several parameters, of which we have chosen 6 to consider for calibration, based on the previous optimisation study by Kriest et al. (2017). The detailed definitions and possible ranges of these parameters are described in that paper.”  
to

“The behaviour of MOPS is controlled by several parameters, of which we have chosen the same 6 parameters to consider for calibration as chosen in the previous optimisation study by Kriest et al. (2017). The detailed definitions and possible ranges of these parameters are described in that paper.”

9. *l. 86: "In general" Is there a review to reference here?*

We thank the reviewer for this comment. We have rephrased

“In general the misfit “landscapes” of biogeochemical models tend to be quite irregular, with many local minima.”

to

“In general the misfit “landscapes” of biogeochemical models tend to be nonlinear, as found by Kriest et al. (2017) for example, who converged to multiple local minima.”

10. *l. 86: "quite" is unnecessary*

We thank the reviewer for this comment. The revision made in regard to the previous comment satisfies this comment also.

11. *l. 87–88: I find the "To determine (...) synthetic observations." sentence hard to parse. Maybe it can be reworded for clarity?*

We thank the reviewer for this comment. We have rephrased

“To determine if an optimiser can find the global minimum within the misfit function landscape “twin” experiments are used, whereby the misfit is calculated between the model outputs and synthetic observations.”

to

“ “Twin” experiments are used to determine if an optimiser can find the global minimum within the misfit function landscape, whereby the misfit is calculated between the model outputs and synthetic observations.”

12. I. 89–90: Suggestion: *"the global minimum [is zero] and optimal parameter values are known"*

We thank the reviewer for this comment. We have rephrased as suggested.

13. I. 90: Suggestion: *"We compare the performance (...)"*

We thank the reviewer for this comment. We have rephrased as suggested.

14. I. 95: *Why not use a differentiable bijection mapping the range to the real line?*

We thank the reviewer for this comment. To remain consistent with (and therefore comparable to) the previous study by Kriest et al. (2017), we applied the same methodology to encourage CMA-ES to converge within specified bounds. This happened to be a penalty score, but other methods are available, such as the one the reviewer suggests. For clarity, we have rephrased

“To ensure that parameters lie within reasonable bounds, a penalty score is added to the misfit when any parameter value goes outside of their specified range.”

to

“To ensure that parameters lie within reasonable bounds, a penalty score is added to the misfit when any parameter value goes outside of their specified range, as also done by Kriest et al. (2017).”

15. I. 96: *Can "various" be replaced with a more descriptive term? Maybe "randomized"?*

We thank the reviewer for this comment, and have changed “various” to “randomized”.

16. I. 96: *It might be useful to briefly describe the covariance matrix there.*

We thank the reviewer for this comment. Section 2.3.1 has been revised to satisfy this.

17. I. 96–98: *"It returns only the parameter configurations which provide the best misfits to a multivariate normal distribution of parameters, then in the next iteration it randomly draws several more parameter configurations, and repeats" is unclear. What is "it"? Which "multivariate normal distribution"? How many is "several"? This sentence sounds like the description of a brute-force random search, which paints an unfavourable picture of what CMA-ES actually does.*

We thank the reviewer for this comment. Section 2.3.1 has been revised to satisfy this. We now state:

“During each iteration, a population size of  $\lambda$  biogeochemical parameter vectors are sampled

from a multi-variate normal distribution, which is fully described by a mean and a positive definite matrix of covariances. CMA-ES then requires the misfit function to be evaluated at these  $\lambda$  locations in the parameter space. The results of these are used to update the mean and covariance of the multi-variate normal distribution, before another  $\lambda$  biogeochemical parameter vectors are sampled for the next iteration."

18. *l. 98: What is a "population"?*

We thank the reviewer for this comment. In every iteration of CMA-ES, the misfit is evaluated  $\lambda$  times (where  $\lambda$  is the population size of 10 in our and Kriest et al. (2017)'s studies). Section 2.3.1 has been revised to clarify this (see response to previous comment).

19. *l. 99: "and therefore aim" reverses the logic. The "aim" is to converge towards the best estimation from the onset. "Therefore", the algorithm employs the strategy to "move" towards lower misfit values.*

We thank the reviewer for this comment. Section 2.3.1 has been revised to satisfy this. We now state:

"With each iteration the population should be guided towards areas of the parameter landscape which provide lower expected misfit values, aiming to converge on the parameter configurations which provide the best misfits."

20. *l. 102–103: This "In order (...) in practice" sentence could be rearranged. Also, an indication of how many function evaluations would be useful. (And "quite" is unnecessary.) Suggestion: "In practice, CMA-ES requires thousands of function evaluations (...)"*

We thank the reviewer for this comment. Section 2.3.1 has been revised to satisfy this. We now state:

"In order to achieve this, CMA-ES can require thousands of function evaluations (e.g. 950-3460 required by Kriest et al., 2017)."

21. *l. 104: What does "was sourced" mean? Is that the exact code? Is it archived and publicly accessible?*

We thank the reviewer for this comment. The CMA-ES code was provided by the supplementary material of the Kriest et al. (2017) study (publicly available), which we then slightly modified to make compatible with our optimisation framework. Our modified CMA-ES code is archived and publicly available (see the final Zenodo DOI in Section 6: Code Availability). Section 2.3.1 has been revised to clarify this. We now state:

"The optimisation code was sourced from the supplementary material by Kriest et al. (2017), with some editing to make it compatible with our chosen optimisation framework (see Section 6)."

22. *l. 109: If  $\mathbf{x}$  is bounded, then starting with  $\mathbf{x} \in \mathbf{R}^n$  is misleading. What about: " $\mathbf{x} \in D$  a bounded domain of  $\mathbf{R}^n$ "?*

We thank the reviewer for this comment. We have revised (what was originally Line 109) to state "...where  $\mathbf{x}$  is an  $n$ -dimensional vector of parameters, each of which is constrained

within specified bounds” and in Equation 1 and equation description we now use  $\mathbf{x} \in D$  a bounded domain of  $\mathbf{R}^n$ , instead of  $\mathbf{x} \in \mathbf{R}^n$ , as suggested by the reviewer.

23. *l. 109–111: Suggestion: "DFO-LS can take into account individual terms of the misfit function and use their structure to improve convergence"*

We thank the reviewer for this comment. This has been changed as suggested.

24. *l. 114: "provably": If there is a convergence proof, then it should be cited. Unless this was supposed to be "probably"?*

We thank the reviewer for this comment. We now include a citation to Appendix A.2 in [Cartis et al 2019-DFOLS paper] that details convergence and complexity rates.

25. *l. 117: What is a typical  $n$ ?*

We thank the reviewer for this comment. As  $n$  is the number of parameters to be optimised by DFO-LS,  $n$  can vary greatly depending on the number of tunable parameters within the chosen model. For clarification in the text, we now state:

“...and at  $n$  additional locations nearby (where  $n$  is the number of parameters to be optimised)....”

26. *l. 117: "for a total of  $n + 1$  function evaluations". I think this can safely be removed.*

We thank the reviewer for this comment. This has been changed as suggested.

27. *l. 117: What does "nearby" mean?*

We thank the reviewer for this comment. During the initial sampling, the  $n$  points are chosen to lie “nearby” the starting location in parameter space, specifically within the initial trust region which encircles the starting location. The size of the initial trust region is determined by the DFO-LS setting **rhobeg** (see what was originally Table 2), which we have set to 0.1. This means no initial sampled point can lie further than  $\pm 10\%$  of each parameter range from the starting point.

As we have now also moved Table 2 to the appendix and cited readers to view the DFO-LS manual for further understanding of DFO-LS settings (see comment response 43 below), we have now revised what was originally Line 117 to be:

“...and at  $n$  additional locations nearby (where  $n$  is the number of parameters to be optimised), with their proximity determined by DFO-LS settings (see Table A1).”

28. *l. 118: Suggestion: "only one misfit function evaluation is needed"*

We thank the reviewer for this comment. This has been revised alongside comment response 30 below.

29. *Fig. 1 Caption:*

- a. *How is the information "combined"? Are the squared misfits simply summed over? If that's the case, it should be stated as such. Otherwise, maybe some clarification of*

*what goes on would be useful.*

We thank the reviewer for this comment. The linearised misfits (green lines in Figure 1), are squared and summed, yes. We have revised the caption to state:

“...3) These linearised misfits are then squared and summed over to give a quadratic approximation (blue line) to the true misfit function. 4)...”

- b. *How can the misfit function be "evaluated if accepted". It seems this is the other way around.*

We thank the reviewer for this comment. The reviewer is correct, and this should be the other way around. We have revised the caption to state:

“...4) Within the trust-region (shaded in yellow) the minimum of the approximation is found, at which the true misfit function is evaluated. 5) If the new point is accepted, this new information is used to update the mini-local regressions, else it is rejected and the trust-region is shrunk. Steps 2-5 are then repeated ...”

30. *l. 119–121: This is only important if the initial sampling constitutes the bulk of the computation. Is that the case in general?*

We thank the reviewer for this comment. The cost of initial sampling is  $n+1$  evaluations, then each subsequent iteration usually requires only 1 evaluation (excluding geometry-improving points and restarts), and only a few of these subsequent iterations are needed to achieve some significant misfit reduction. Therefore, the initial sampling can constitute the bulk of computation, if the user only seeks significant misfit reduction. However, in our case with twin experiments, we are seeking a misfit close to zero, and therefore we continue to run more iterations and associated evaluations, meaning the initial sampling is superseded by the total number of iterations.

We are not trying to state that the cost of DFOLS increases linearly with  $n$ , only the initial sampling. We see this is only important information if the initial sampling dominates the computation expense, which we have explained above is not always the case. Therefore, we have revised:

“In subsequent iterations only one function evaluation is needed. This is important to note because it means the computational expense of the initial sampling by DFO-LS increases only linearly with the number of parameters to be optimised.”

to

“In subsequent iterations typically only one function evaluation is needed, and often only a handful are needed to achieve significant misfit reduction.”

31. *l. 133: "minima ." (space before dot)*

We thank the reviewer for this comment. This has been corrected.

32. *l. 139: "much" is not needed.*

We thank the reviewer for this comment. This has been corrected.

33. *l. 139: "This is much more computationally expensive than a soft restart" Why is it the case?*

We thank the reviewer for this comment. A restart is where the trust region expands,  $n+1$  points are taken from within this new trust region, before the optimisation continues again. The difference between a hard and soft restart is how DFO-LS gets the misfit information for these new  $n+1$  points. A hard restart is like initialising all over again, whereby the (expensive) true misfit function is evaluated  $n+1$  times. Contrastingly, a soft restart requires a smaller number of evaluations of the true misfit function. It "shifts" some of the existing  $n+1$  points to get the predicted misfit information (see geometry improving points in Section 3.1 of the Cartis et al 2019-DFOLS paper).

We were not very clear with this in the text. Therefore, we have revised to state

"During a restart the trust region expands, allowing DFO-LS to search for points potentially outside the local minimum it may be trapped in, and move towards a lower minimum elsewhere. This can be done by either a "hard" restart, whereby the (expensive) misfit function is re-evaluated at  $n+1$  new locations within the expanded trust region, or by a "soft" restart, whereby DFO-LS only "shifts" some of the current  $n+1$  points in parameter space to geometry-improving points (Cartis et al., 2019). The former is more computationally expensive, therefore we don't use it here, although soft restarts are allowed..."

34. *l. 148–149: Are these personally communicated regions available in a public archive? Reproducibility hinges on such availability.*

We thank the reviewer for this comment. Yes, the biomes mask files are available in the third DOI given in Section 6 Code Availability.

35. *Eq. (2): Does  $V_i^{i \in j} = 0$  when  $i \notin j$ ? If so, I would suggest just having  $V_i$  instead, and summing over only  $i \in j$  (instead of summing, potentially redundantly, over all  $i$ )*

We thank the reviewer for this comment. This has been revised as suggested.

36. *l. 158: "eddies" can be large. Maybe "unresolved eddies" is clearer?*

We thank the reviewer for this comment. This has been revised as suggested.

37. *Fig 2. Caption: Which reference defines the 19 regions? Henson et al (2010) or Weber et al (2016)?*

We thank the reviewer for this comment. The majority of the regions were as in Henson et al (2010), but with the regions in the Southern Ocean determined as in Weber et al (2016). To clarify this, we have revised the caption to state:

"...Overlain are the boundaries of 13 biomes of similar biogeochemistry, the majority of which were determined as in Henson et al. (2010), while those in the Southern Ocean as in Weber et al. (2016). Six regions have been further split by depth, leading to a total of 19 regions."



38. Eq. (30) + many lines: " $f_{global}$ ". Usually non-variable subscripts are typeset upright. Also, "global" is misleading, since there are many tracers. On the other hand, for volumes, the authors use "T", for "total", I guess. Maybe no subscript for this "total"  $f$ ? Or maybe swap the "T" and "global" subscripts throughout?

We thank the reviewer for this comment. "T" and "global" subscripts have been swapped throughout, both in typeset upright, as suggested by the reviewer.

39. l. 171: How is the interpolation done?

We thank the reviewer for this comment. This was done by linear interpolation. We have revised the text to state:

"These standard deviations fields were linearly interpolated onto the model grid..."

40. l. 172: Why three noise realizations?

We thank the reviewer for this comment. As the noise realisations involve randomness, we had to run more than one to show robustness of results, and we could do no more than three due to computational expense.

41. l. 189 and throughout: I kept going back to read what differentiated each experiment from the other. Maybe the authors can find more expressive names for their experiments? E.g., `exp_d1` could be `D_noise` and `exp_d2` could be `D_smooth`? `exp_drngi` could be `D_randi`? And `exp_d1_sparse` could be `D_smooth_sparse`, and so on.

We thank the reviewer for this comment. We have revised experiment names in all tables, figures and text to the following:

- C\_smooth
- D\_smooth\_1 and D\_smooth\_2
- D\_noise\_rand1, D\_noise\_rand2 and D\_noise\_rand3
- D\_smooth\_sparse\_1 and D\_smooth\_sparse\_2

42. l. 183–204: What about an experiment combining sparse and randomized observations?

We thank the reviewer for this comment. We found including data sparsity with non-noisy observations had little influence on convergence (excluding the insensitive KPHY, which we discuss latter in the responses to the reviewer's comments), therefore we assumed including data sparsity with the randomized observations would also have little influence. The computational expense of additional runs to confirm/deny this was deemed too costly for us to address this additional question in our study.

43. Table 2. It is unclear what all the settings do. Also, all the caption experiment names do not match the main text.

We thank the reviewer for these comments. The caption has been corrected. The settings in this table include too high a level of detail for the main text, therefore this table has been moved to the appendix. It is mainly for DFO-LS users, and only in case they want to know. Not knowing these settings does not hinder the reader's understanding of this study, but more in-depth descriptions can be found in the DFO-LS user manual, freely downloadable with the software. Also, they are not required to know for reproducibility, as the files in the

provided DOIs already include this information, in the format required for the optimisation framework to parse.

44. *l. 208: the authors say they "plot" values but instead show a table.*

We thank the reviewer for this comment. The text first states we show Tables 3 and 4, but we do not describe these tables here in the text yet (the tables are summaries of Figures 3-10, therefore we describe them together in Sections 3.1-3.3). We then move on in the text to state that in the following sections we then plot the global misfit and parameter values throughout each separate experiment (meaning Figures 3-10). We then explain how to understand the information in the figures, before going on to describe all the results (tables and figures together). We have revised this text to state:

"The results for all twin optimisation experiments are summarised in Tables 2 and 3, which show the starting and optimised parameter values, and parameter recovery information. In the subsequent sections we then plot both the global misfit and parameter values for every function evaluation throughout each individual optimisation experiment (Figures 3-10). During one CMA-ES iteration..."

*Indeed, Table 3 looks like it would deserve to be turned into a plot with 6 panels (6x1, one for each parameter) with each experiment on the x-axis, and the optimized value on the y axis. With a color code that conveys the groupings (smooth, sparse, noisy, and so on).*

We thank the reviewer for these comments. Table 3 has been replaced by a figure such as described and suggested by the reviewer. So to not lose the precise value information of both the parameter and misfit information provided by Table 3, it has been moved to the appendix.

*The same goes for Table 4, which could be turned into a combination of bar plots (with a broken axis to cater for a large number of evaluations for CMA-ES rather than a misleading logscale).*

We thank the reviewer for this comment. Table 4 has been replaced by a figure such as described and suggested by the reviewer. Table 4 has been moved to the appendix.

45. *Table 4. Some of the experiment names do not match the main text. Is "subsel" the same as "sparse"?*

We thank the reviewer for this comment. This has been corrected.

46. *l. 277: Maybe I read this incorrectly, but it seems the authors report that only 1/6 of the DFO-LS experiments recovered all 6 target parameters (Table 4). This is swept under the rug here. I think it would be useful to discuss the failures of convergence for some parameters here.*

We thank the reviewer for this comment.

As we compare a smooth, non-sparse CMA-ES experiment to DFO-LS, we should only compare the DFO-LS experiments which were also smooth and non-sparse. These are experiments exp\_d1 and exp\_d2 (now called D\_smooth\_1 and D\_smooth\_2). Of these two,

half recovered all 6 target parameters. Of the remaining 5 DFO-LS experiments, where noise or sparsity were included, none recover all 6 target parameters. However, these experiments were all started from the same parameter location as either D\_smooth\_1 or D\_smooth\_2. DFO-LS is deterministic, meaning the convergence from the same starting location should be the same every time, therefore any worsening in each respective experiment's convergence is solely due to the influence of either observational noise or data sparsity. Table 1 has been revised to better partition the experiments.

That being said, a half convergence success is still not ideal, and does not indicate DFO-LS can robustly recover all 6 of these parameters. However, both D\_smooth\_1 and D\_smooth\_2 experiments (the only 2 experiments we did that are comparable to the CMA-ES run) successfully recovered 5/6 of the parameters, and it was only one particular parameter which failed to be recovered:  $K_{phy}$ .

Our misfit function is particularly insensitive to  $K_{phy}$ , as we illustrate next. CMA-ES also struggled to find this parameter, as it tuned it last (after  $\sim 1700$  evaluations, when all the others had been recovered by  $\sim 900$  evaluations). To show this insensitivity, we have calculated the change in misfit after a 10% perturbation of each individual parameter (see figure below). A perturbation in  $K_{phy}$  caused the smallest change in the misfit ( $4.1 \times 10^{-6}$ ).

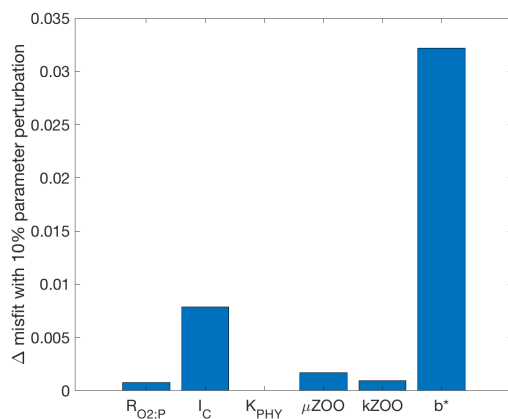

Therefore, we have revised to ensure our narrative states that DFO-LS can robustly recover all parameters, providing the misfit function is sufficiently sensitive to each parameter, and we have included this sensitivity information in the results section of the paper.

The alternative would be to run additional experiments with randomised starting locations, and see how often  $K_{phy}$  can be successfully recovered, as the reviewer suggests in their next comment. However, the misfit function is so insensitive to this parameter, and D\_smooth\_2 still manages to reduce with misfit to well below the expected baseline despite unsuccessful  $K_{phy}$  convergence. Therefore, we do not think the large computational expense of these additional runs is worth tuning what could be deemed a relatively unimportant parameter.

47. *I. 290–297: This seems like a significant caveat. The justification for capping the number of evaluations for DFO-LS to 70 is unsubstantiated. Combined with the above comment it seems that the authors' (5?) original experiments with DFO-LS all failed to recover all 6 parameters, and they then added an extra experiment with a different starting point for  $K_{PHY}$  that is at least twice as close as its target value (Figure 6). In my opinion, this places the robustness of the approach under question, and therefore I would recommend additional experiments with randomized starting values.*

We thank the reviewer for this comment. The maximum number of evaluations was determined as  $(n+1)*10$ , where  $n = 6$  parameters (roughly equivalent to 10 iterations of a derivative based method). The 10 was subjectively chosen, as a trade-off between sufficient evaluations to allow significant misfit reduction, and computational expense of each evaluation. This value is a typical example of “short budgets” for DFO test in nonlinear optimisation. More technically, and specific to our particular case, the maximum wall clock time allowed on the supercomputing cluster used is 120 hours, within which we could just fit 70 sequential evaluations of the misfit function.

Regarding  $K_{phy}$  and robustness, please see the response to the reviewer’s previous comment.

48. *I. 315: While technically feasible, I would consider using "oxygen concentrations" as a constraint rather than the "location of oxygen minimum zones", which is subjectively defined by an arbitrary threshold.*

We thank the reviewer for this comment. We mean by this sentence that one could add more constraints to the misfit, such as phytoplankton and zooplankton data, or additional oxygen constrains (as we already use oxygen concentrations in our misfit) such as done by Niemeyer et al. 2019 who included the location of oxygen minimum zones. In this study they calculated the overlap between simulated and observed oxygen minimum zones. We have revised the text to state:

“In order to optimise less sensitive parameters before reaching noise levels one could introduce more metrics into the misfit calculation to help constrain these parameters, for example phytoplankton and zooplankton data, or additional oxygen constrains, such as the location of oxygen minimum zones as done by (Niemeyer et al., 2019).”

49. *Figures 7, 9 captions should repeat what the vertical arrows mean (soft restarts)*

We thank the reviewer for this comment. This has been revised as suggested.

50. *One of the main citations of the manuscript (Cartis et al., arXiv, 2018) should be replaced by the more recent and, importantly, peer-reviewed, version (Cartis et al., Optimization, 2021, doi: 10.1080/02331934.2021.1883015).*

We thank the reviewer for this comment. This has been corrected.
